# Supplementary material for: A spider silk-derived solubility domain inhibits nuclear and cytosolic protein aggregation in human cells
Source: PubMed Central journal article supplement (PMC9135726; doi:10.1038/s42003-022-03442-5), 2022-05-26

## **Supplementary Figure 1**

Hela cells were transiently transfected with AgDD-sfGFP or NT\*-sfGFP and incubated in the absence or presence of 1  $\mu$ M Shield-1 for 16 hours. Cells were fixed 24 hrs after transfection with 4% PFA and counterstained with Hoechst. Scale bar 20  $\mu$ m.

Supplementary Figure 1

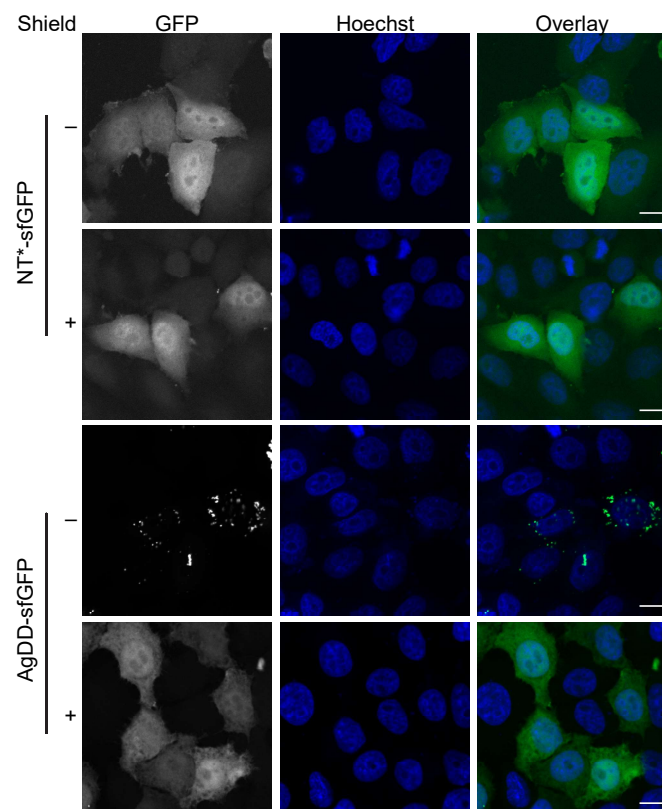

## **Supplementary Figure 2**

Uncropped scans of western blots. Labels refer to the panels of the figures in the main manuscript.

Figure 1b

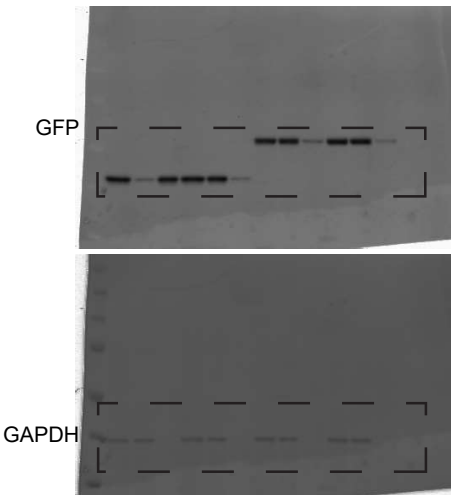

Figure 2c

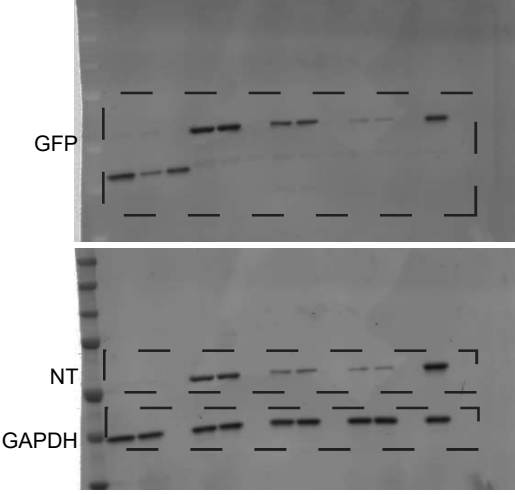

Figure 3c

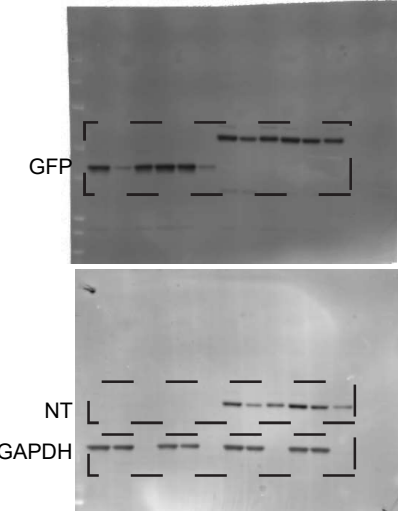

Figure 3d

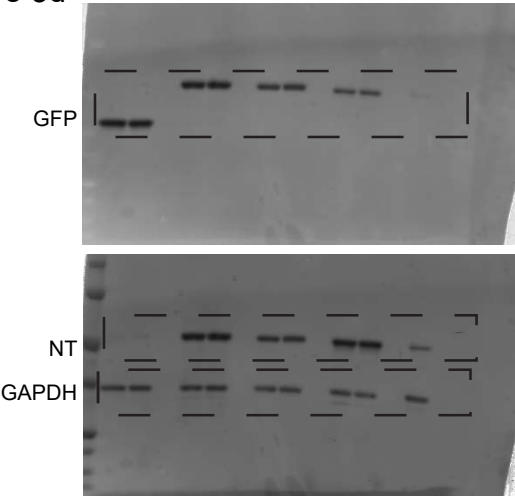

Supplement: 42003_2022_3442_MOESM2_ESM.pdf [file 42003_2022_3442_MOESM2_ESM.pdf]
