# Supplementary material for: A spider silk-derived solubility domain inhibits nuclear and cytosolic protein aggregation in human cells
Source: PubMed Central journal article supplement (PMC9135726; doi:10.1038/s42003-022-03442-5), 2022-05-26
Supplement: 42003_2022_3442_MOESM3_ESM.pdf [file 42003_2022_3442_MOESM3_ESM.pdf]

## Description of Additional Supplementary Files

**File name:** Supplementary Data 1

**Description:** The original data of the graphs.
